# Supplementary material for: Systematic Review and Meta-Analysis for a Global Patient co-Owned Cloud (GPOC)
Source: Research Square preprint supplement (doi:10.21203/rs.3.rs-3004559/v1), 2023-07-05

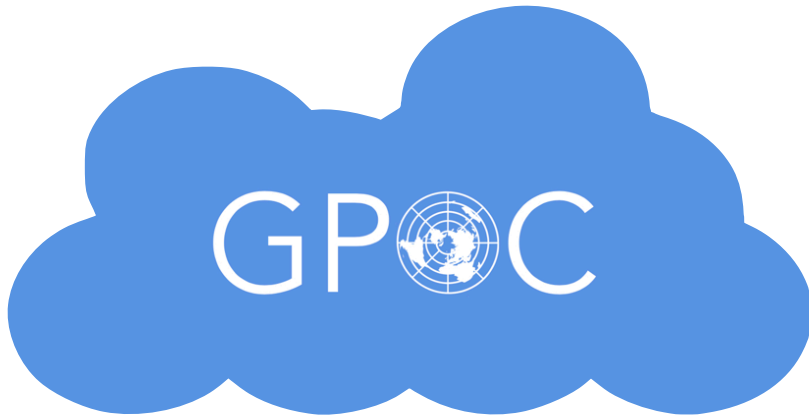

GPOC  
SURVEY

GPOC  
DELPHI SUMMIT

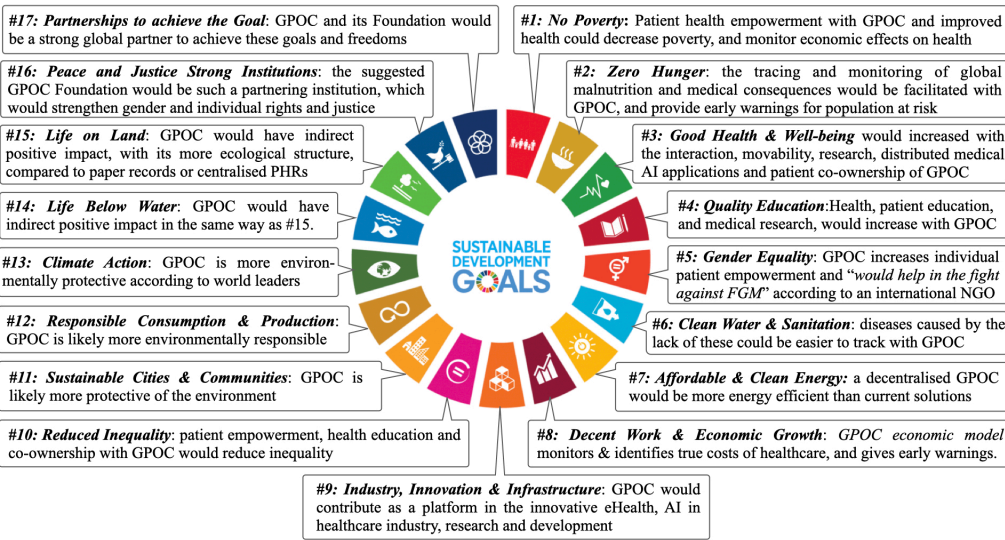

**GPOC**

| Study | ES (95% CI)       |
|-------|-------------------|
| 1     | 3.97 (3.95, 3.98) |
| 2     | 4.19 (4.17, 4.20) |
| 3     | 4.41 (4.40, 4.42) |
| 4     | 4.71 (4.70, 4.72) |
| 5     | 4.94 (4.93, 4.94) |
| 6     | 2.59 (2.57, 2.61) |
| 7     | 2.81 (2.79, 2.82) |
| 8     | 3.03 (3.02, 3.04) |
| 9     | 3.33 (3.32, 3.34) |
| 10    | 3.56 (3.55, 3.56) |
| 11    | 2.08 (1.88, 2.28) |
| 12    | 2.08 (1.88, 2.28) |
| 13    | 2.08 (1.88, 2.28) |
| 14    | 2.11 (1.92, 2.31) |

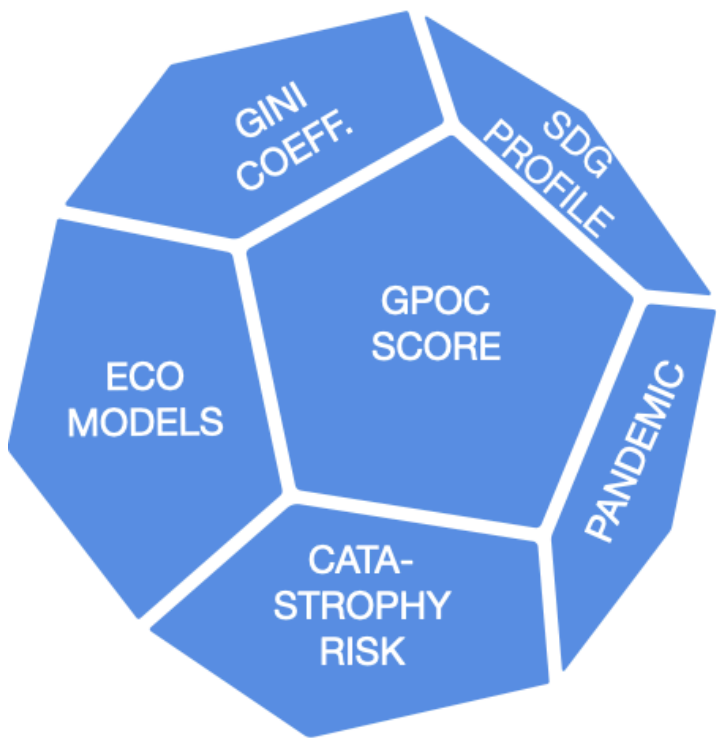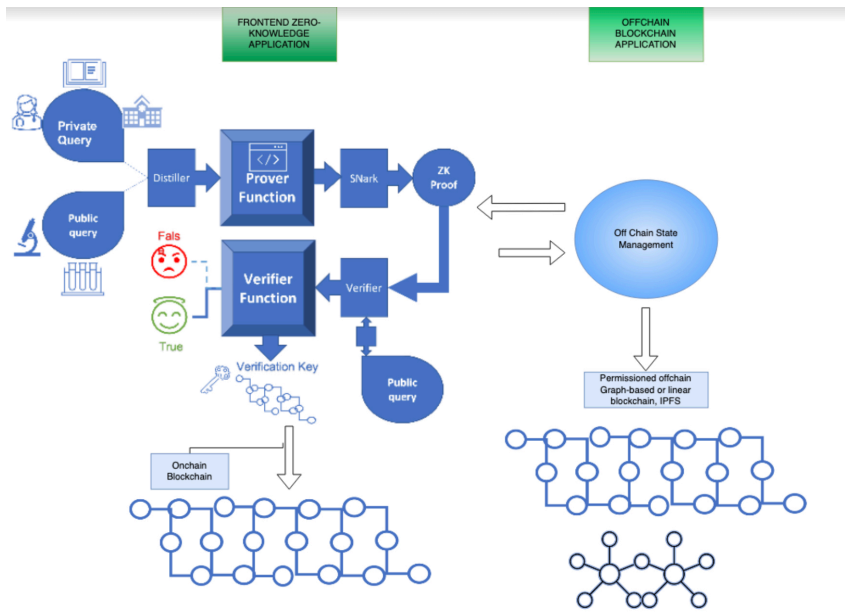

The diagram illustrates a five-state process flow. At the center is a green circle labeled "Ready". Surrounding it are four other circles: a red circle labeled "Hesitant" on the left, an orange circle labeled "Weakly Approaching" at the top, a yellow circle labeled "Moderately Approaching" on the right, and a light green circle labeled "Welcoming" at the bottom. Blue arrows show a clockwise flow from Ready to Hesitant, Hesitant to Weakly Approaching, Weakly Approaching to Moderately Approaching, Moderately Approaching to Welcoming, and Welcoming back to Ready. Each circle also has a self-loop arrow.

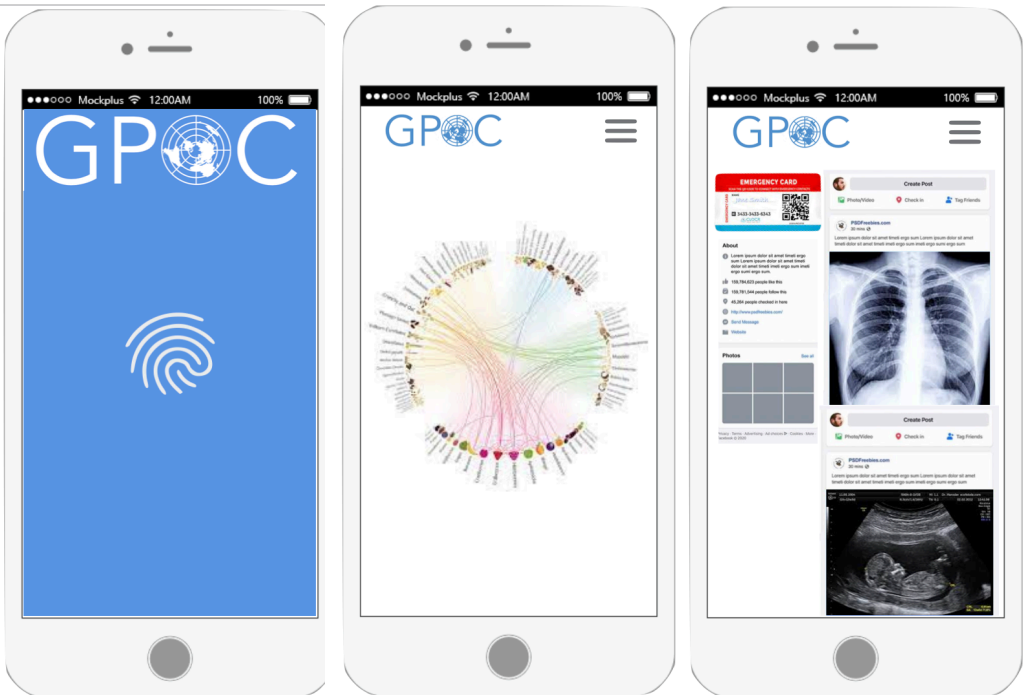

Supplement: Supplementary file 1 [file 15525e972ac8c4a42f1f9ff4.pdf]
